# Supplementary material for: Inhibition of Fungal Growth and Induction of a Novel Volatilome in Response to Chromobacterium vaccinii Volatile Organic Compounds
Source: Front Microbiol. 2020 May 20;11:1035. doi: 10.3389/fmicb.2020.01035 (PMC7251293; doi:10.3389/fmicb.2020.01035)
Supplement: Supplementary file 3 [file Data_Sheet_3.xlsx]

## Sheet: SI Table VOCs
	Table S2: Compound identification, chromatographic characteristics, and mean peak intensities for the 53 VOCs that differ significantly in abundance between microbial cultures and media controls.
								Cv			P-Cv			P			P-CvW			CvW			Media Blanks
	Compound ID	CAS	ID Level	1tR mean	2tR mean	LRI	Functional class	n	mean area	std. dev.	n	mean area	std. dev.	n	mean area	std. dev.	n	mean area	std. dev.	n	mean area	std. dev.	n	mean area	std. dev.
1	Thiazole	288-47-1	2	886.192	1.58288	752.928	sulfur containing	6	5635.93	5299.69	6	15987.1	17362.6	6	20702	7126.84	4	1966.83	3147.52	6	8973.68	9145.73	3	7272.61	4996.96
2	Dimethyl disulfide	624-92-0	3	888	1.03983	754.913	sulfur containing	6	8114.45	6164.95	6	5966.76	4632.56	2	4.08194	5.24728	6	12391.7	9545.37	6	18512.6	10898.5	0	0	0
3	UNK-3		4	1065.79	1.29241	861.807	unknown	2	183.214	429.253	3	6.32283	5.87732	6	34635.7	17509.4	4	174.557	371.107	1	2.49623	3.66499	1	9.48703	14.7
4	CA-4		3	1118.83	1.43667	843.236	carboxylic acid	1	15.7251	36.0689	1	3.40501	5.89105	2	45.7454	103.979	3	4607.77	10927	1	2.90889	4.6758	0	0	0
5	CA-5		3	1117.16	1.18226	841.608	carboxylic acid	2	1407.05	3421	5	47.9409	86.1624	6	4642.61	3937.42	5	1762.84	2762.04	0	0	0	2	93.4558	119.567
6	UNK-6		4	1221.04	1.5992	942.741	unknown	1	1591.73	3896.47	5	132.179	281.185	5	8465.07	8902.51	3	1725.97	4159.83	0	0	0	1	7.55841	11.3595
7	HC-7		3	1248	0.715789	968.988	hydrocarbon	0	0	0	5	1403.76	1832.47	5	139.666	300.625	1	4.40559	8.34196	0	0	0	0	0	0
8	HC-8		3	1292.33	0.7025	1012.15	hydrocarbon	1	7.42594	15.7403	4	599.38	1284.33	2	3.67918	4.15136	0	0	0	0	0	0	0	0	0
9	OTH-9		3	1292.31	2.04*	1012.12	other	3	448.013	1073.52	1	3.09378	5.12868	2	31.6795	68.8399	3	3489.17	8437.25	0	0	0	0	0	0
10	1,2-Ethanediol, diacetate	111-55-7	2	1391.73	1.36189	1009.51	ester	4	3858.66	6254.3	4	1845.5	4134.97	6	16765	13680.7	4	10305.7	17631.1	3	15.6715	17.9936	1	3854.4	6674.28
11	S,N-11		3	1424.86	1.55071	1043.29	sulfur, nitrogen containing	4	18.3739	17.6302	3	1135.29	1897.01	6	3814.27	3900.85	0	0	0	2	27.8906	61.8615	0	0	0
12	Dimethyl trisulfide	3658-80-8	2	1429.81	1.18077	1048.34	sulfur containing	6	6911.61	5777.94	6	1817.85	2844.3	3	6.25864	5.86836	4	2168.44	1909.17	6	6350.56	7770.39	0	0	0
13	N-13		3	1491.32	0.9504	1007.22	nitrogen containing	4	10.8494	10.4981	5	1858.33	2982.37	6	394.448	296.71	6	4239.39	5101.72	3	6156	9878.29	3	1120.36	41.879
14	CA-14		3	1549.07	2.52*	1068.33	carboxylic acid	1	414.194	1012.12	0	0	0	6	28613.7	50819.5	1	38.7506	92.4696	0	0	0	0	0	0
15	N-15		3	1595.71	1.51714	1117.7	nitrogen containing	1	397.999	972.445	2	4.91481	6.07548	3	439.445	978.688	2	821.202	2001.15	0	0	0	0	0	0
16	EST-16		3	1602.96	2.41*	1125.37	ester	3	733.446	1780.32	0	0	0	6	2300.24	2462.58	4	1245.31	2729.82	2	928.385	2140.97	0	0	0
17	1-Octanol	111-87-5	2	1626.69	1.13851	1150.47	alcohol	6	21291.6	16165.1	6	6260.86	4657.01	5	258.226	345.698	6	1093.1	1917.18	6	3291.35	2879.16	3	638.984	427.535
18	CA-18		3	1671.57	2.54*	1093.79	carboxylic acid	5	8619.12	6134.53	6	16431.6	13124.1	0	0	0	0	0	0	0	0	0	0	0	0
19	S-19		3	1759.78	2.50*	1190.33	sulfur containing	0	0	0	1	2.05482	2.58376	0	0	0	6	2450.99	5082.38	0	0	0	0	0	0
20	UNK-20		4	1760.84	1.16895	1191.49	unknown	2	83.2787	164.053	1	5.75306	11.6426	3	30389.8	73002	3	3944.78	9401.33	3	139.349	197.058	1	11.3755	17.9709
21	UNK-21		4	1770.36	1.13182	1201.92	unknown	1	3.35831	5.77666	1	1.92286	2.26053	2	34.7225	65.2801	4	82.8994	175.827	0	0	0	0	0	0
22	UNK-22		4	1805.49	0.701538	1240.36	unknown	4	1333.69	2274.64	6	465.934	651.358	6	704.631	594.192	5	604.374	702.605	1	1.8323	2.03872	0	0	0
23	ETH-23		3	1843.29	2.05*	1175.99	ether	2	18.3276	38.3167	2	5.57026	7.08388	2	35.974	81.8699	4	2394.13	5592.69	0	0	0	0	0	0
24	Octanoic acid	124-07-2	2	1865.73	2.21*	1201.57	carboxylic acid	6	10537.9	10049.9	6	12865.5	9467.23	6	14228.8	7303.17	6	17987.6	15763.6	5	1849.68	2745.48	3	1667.09	1295.78
25	CA-25		3	1874.08	1.2972	1211.09	carboxylic acid	1	14.3037	32.5874	5	108.189	222.181	5	6044.78	6338.02	5	2850.02	4769.97	0	0	0	0	0	0
26	HC-26		3	1985.44	0.727778	1338.02	hydrocarbon	0	0	0	5	1359.84	1946.77	4	44.3142	60.5543	0	0	0	0	0	0	0	0	0
27	UNK-27		4	2020.3	1.3095	1377.74	unknown	5	11713.8	17878.8	6	3620.91	7580.31	0	0	0	0	0	0	0	0	0	0	0	0
28	UNK-28		4	2075.3	0.824259	1338.31	unknown	5	47688.4	52233.3	1	7.48714	15.8902	6	53573.2	11539.2	6	12620.9	30722.5	6	21635.5	18576.7	3	22340.4	1458.48
29	ETH-29		3	2079.38	2.68*	1343.1	ether	6	213952	330728	1	6.80176	14.2114	6	100467	116979	2	63408.6	155024	6	58414.5	96035.8	2	887.275	1286.79
30	ETH-30		3	2194.23	1.60208	1477.81	ether	5	10014.9	17987.4	4	19.0259	14.3285	6	162341	56446.1	3	411.598	960.704	6	43677.2	35996.2	3	37497.4	5770.47
31	ETH-31		3	2194	1.32143	1477.55	ether	0	0	0	1	2.48775	3.64423	0	0	0	4	401.272	677.118	0	0	0	0	0	0
32	Indole	120-72-9	2	2199.44	1.0028	1483.93	heteroaromatic	1	2.92408	4.713	0	0	0	0	0	0	6	50012.6	80953.8	6	30902.5	35413.2	0	0	0
33	EST-33		3	2244.05	2.27*	1435.15	anhydride	3	105.914	174.081	6	3939.82	2632.38	0	0	0	6	8024.58	9108.92	2	4.76817	5.83898	1	4.89192	6.74101
34	EST-34		3	2305.9	1.23128	1508.95	ester	6	18881	7888.85	6	31361.4	10895.8	6	24286.1	9865	6	26838.1	11619.1	6	7300.85	7829.98	3	12509.9	12018.9
35	UNK-35		4	2310.44	0.984444	1514.37	unknown	4	3348.39	8109.71	0	0	0	3	1502.06	3252.72	2	35.0754	74.2297	4	3686.12	8655.09	0	0	0
36	UNK-36		4	2309.14	1.32857	1512.82	unknown	2	1482.65	3600.64	0	0	0	0	0	0	3	2155.63	5032.88	0	0	0	0	0	0
37	UNK-37		4	2339.25	0.48625	1548.74	unknown	0	0	0	3	6.27891	5.79683	0	0	0	3	785.025	1883.29	0	0	0	0	0	0
38	EST-38		3	2344	0.993333	1554.41	ester	4	310.15	617.252	2	61.1214	102.499	4	1234.28	1329.44	1	10.5836	23.475	1	2.62901	3.99026	0	0	0
39	ETH-39		3	2355.24	1.75	1567.83	ether	5	24224.3	55153.8	6	28493.6	24525.2	1	6.49075	13.4495	6	74338.9	99758.3	2	518.278	1255.17	2	38.5253	51.5935
40	T-40		3	2364.34	0.870286	1578.68	terpene	5	920.756	1200.85	0	0	0	2	3.47256	3.98402	5	255.584	425.043	5	877.572	1549.2	3	217.754	278.435
41	UNK-41		4	2407.45	1.21023	1534.15	unknown	6	32827.2	41776.8	4	1167.39	2621.72	3	35532.4	39375	4	4151.22	9923.63	5	18849.5	19559.5	1	17.5893	28.7335
42	N-42		3	2424.17	1.77667	1552.65	nitrogen containing	3	17131.6	29710.1	3	68.8279	145.795	0	0	0	0	0	0	2	8.67589	13.5275	0	0	0
43	UNK-43		4	2429.82	1.18818	1558.9	unknown	3	298.869	708.669	1	2.63378	4.00192	0	0	0	4	328.498	492.986	0	0	0	0	0	0
44	ARO-44		3	2433.86	1.0125	1563.37	aromatic hydrocarbon	0	0	0	6	873.013	921.121	6	858.797	1069.53	1	8.12029	17.4411	0	0	0	0	0	0
45	ARO-45		3	2464.25	1.01042	1597.01	aromatic hydrocarbon	4	135.002	295.125	6	108620	48428.9	6	258735	136203	1	12257.1	30021.1	2	15.2769	31.8937	3	481.911	500.012
46	α-Calacorene	21391-99-1	2	2464.24	1.08647	1596.99	terpene	0	0	0	6	532.193	1055.86	2	273.588	605.514	1	10.0544	22.1787	0	0	0	0	0	0
47	UNK-47		4	2491.27	2.38*	1626.91	unknown	3	3617.94	8690.78	6	2697.1	2855.94	0	0	0	6	2687.83	4010.5	1	3.69172	6.59335	0	0	0
48	EST-48		3	2502.94	1.77125	1639.82	ester	2	26.7585	46.5728	6	26055.2	31108.8	0	0	0	6	58159.1	53624	3	50.8366	72.9992	0	0	0
49	UNK-49		4	2530.29	1.29826	1670.09	unknown	6	1273	1885.1	6	18806.5	12048.5	6	36008.8	26405.5	6	3799.38	7542.26	6	1596.91	1373.16	2	165.531	147.474
50	ETH-50		3	2578	2.35*	1627.68	ether	2	751.147	1416.88	5	163664	381945	0	0	0	5	690792	1.48098e+06	1	31.058	73.6268	0	0	0
51	ARO-51		3	2635.7	1.18741	1686.52	aromatic hydrocarbon	0	0	0	6	1673.98	3231.92	6	2430.22	3351.31	1	5.61038	11.2931	0	0	0	0	0	0
52	UNK-52		4	2658.86	1.62243	1710.14	unknown	2	3887.36	8901.35	6	3.94804e+06	2.30674e+06	0	0	0	5	3.05511e+06	2.72901e+06	4	541.04	1203.16	0	0	0
53	N-53		3	2667.06	1.23471	1718.49	nitrogen containing	1	225.01	548.71	2	10413.1	25486.9	0	0	0	3	19961.5	33571	4	374.777	854.713	0	0	0
	Notes:
	ARO = aromatic hydrocarbon, CA = carboxylic acid, EST = ester, ETH = ether, HC = hydrocarbon, N = nitrogen containing, OTH = other, S = sulfur containing, T = terpene, UNK = unknown
	1tR = First dimension retention time
	2tR = Second dimension retention time
	* = Two seconds (1 modulation peroid) has been added to the measured 2tR based on evidence that the peak was wrapped
	LRI = Linear retention index; bold indicates RI is consistent with the midpolar Rxi-624Sil stationary phase, as previously described by Bean et al., 2016
	Cv = C. vaccinii MWU328 mono-cultures
	CvW = C. vaccinii MWU328W mono-cultures
	P-Cv = Phoma sp., MWU328 co-cultures
	P-CvW = Phoma sp., MWU328W co-cultures
	P = Phoma sp. mono-cultures
	Mean area = geometric means
